**Essentials of Human Anatomy.** By RUSSELL T. WOODHINE, A.M., Ph.D., Professor of Anatomy, University of Michigan Medical School. Cloth \$12.50. Pp. 629 with 403 illustrations. Oxford University Press, 114 Fifth Avenue, New York 11, N. Y., 1957.

This new textbook covers the body anatomy by regions. From its contents one would judge that it would be of particular value to first year medical students as a supplement to their dissecting manuals.

There are no practical applications of anatomical features, as are present in larger anatomical texts. Nor, as the author states in the preface, are anatomical anomalies discussed to any extent. This is a streamlined, straightforward, logical presentation of anatomy.

The illustrations are clear, well designed and most of them have been prepared specifically for this book and add tremendously to its value.

C. R. STEPHEN, M.D.

## OTHER NEW BOOKS

The receipt of the following books is acknowledged, and this list must be regarded as a sufficient return for the courtesy of the sender.

**American Medical Association Scientific Exhibits 1957.** Sponsored by Council on Scientific Assembly, American Medical Association. Cloth \$15.00. Pp. 480 with illustrations. Published by Grune and Stratton, Inc., 381 Fourth Ave., New York 16, 1957.

**The Author-Publisher-Printer Complex.** Third Edition. By ROBERT S. GILL. Cloth \$2.25. Pp. 131, with 8 illustrations. The Williams & Wilkins Company, Mount Royal and Guilford Avenues, Baltimore 2, Maryland, 1958.
